# Supplementary material for: Inhibition of PKCθ Improves Dystrophic Heart Phenotype and Function in a Novel Model of DMD Cardiomyopathy
Source: MDPI journal article supplement (doi:10.3390/ijms23042256), 2022-02-18
Supplement: s1 [file s1]

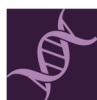

Supplementary materials

# Inhibition of PKC $\theta$ Improves Dystrophic Heart Phenotype and Function in a Novel Model of DMD Cardiomyopathy

Jacopo Morroni <sup>1</sup>, Leonardo Schirone <sup>2</sup>, Valentina Valenti <sup>3</sup>, Clemens Zwergel <sup>4</sup>, Carles Sánchez Riera <sup>1</sup>, Sergio Valente <sup>4</sup>, Daniele Vecchio <sup>2</sup>, Sonia Schiavon <sup>2</sup>, Rino Ragno <sup>4</sup>, Antonello Mai <sup>4</sup>, Sebastiano Sciarretta <sup>2,5</sup>, Biliana Lozanoska-Ochser <sup>1,\*</sup> and Marina Bouché <sup>1,\*</sup>

<sup>1</sup> Department of Anatomical, Histological, Forensic Medicine and Orthopaedic Sciences, Section of Histology and Embryology, Sapienza University of Rome, Rome, 00161, Italy; jacopo.morroni@uniroma1.it (J.M.); carles.sanchezr@gmail.com (C.S.R.); biliana.lozanoska-ochser@uniroma1.it (B.L.-O.)

<sup>2</sup> Department of Medical and Surgical Sciences and Biotechnologies, Sapienza University of Rome, Rome, 00185, Italy; leonardo.schirone@uniroma1.it (L.S.); daniele.vecchio@uniroma1.it (D.V.); sonia.schiavon@uniroma1.it (S.S.); sebastiano.sciarretta@uniroma1.it (S.S.)

<sup>3</sup> Department of Cardiology, Ospedale Santa Maria Goretti, Latina, 04100, Italy; valevale2012@hotmail.com

<sup>4</sup> Department of Drug Chemistry and Technologies, Sapienza University of Rome, Rome, 00185, Italy; clemens.zwergel@uniroma1.it (C.Z.); sergio.valente@uniroma1.it (S.V.); rino.ragno@uniroma1.it (R.R.); antonello.mai@uniroma1.it (A.M.)

<sup>5</sup> Department of AngioCardioNeurology, IRCCS Neuromed, 86077 Pozzilli, Italy

\* Correspondence: marina.bouche@uniroma1.it

† These authors contributed equally to this work.

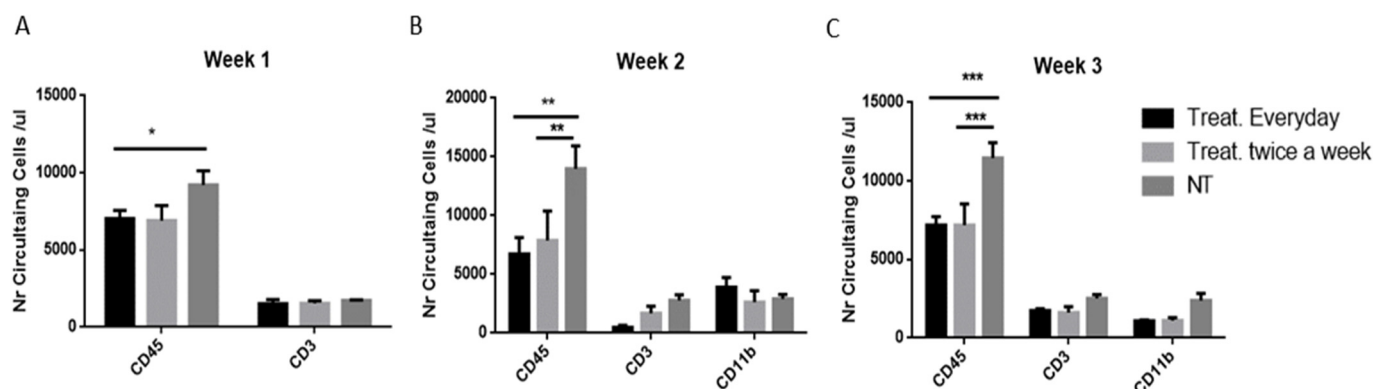

**Figure S1.** C20 twice administration is effective in reducing circulating CD3+ and CD11b+ cells in mdx mice. Number of circulating CD3+ and CD11b+ cells in mdx mice blood after 1 (A), 2 (B) or 3 (C) weeks of treatment (twice/week) by IP injection at the dose of 5 mg/kg. Data are presented as media of the CD3+ circulating number normalized per microliter of blood  $\pm$  SEM;  $n = 3$  independent samples/group. \* =  $p < 0.05$ , \*\* =  $p < 0.01$ , \*\*\* =  $p < 0.001$ , one-way ANOVA with Bonferroni correction for multiple comparisons.

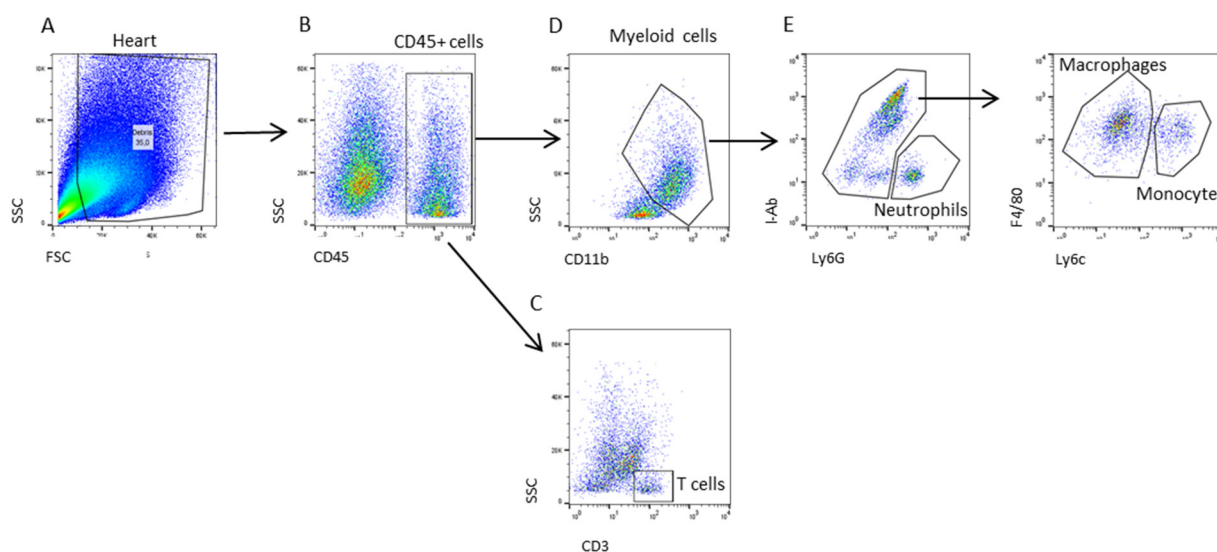

**Figure S2.** Cytofluorimetric gating strategy. (A) Heart infiltrating cells were isolated as described in Materials & Methods and analysed with the instrument CyAn ADP (DAKO) and FlowJo software 10.1. (B) Single, DAPI-negative (live) cells were then gated for their positivity to CD45 to identify the hematopoietic lineage. CD45<sup>+</sup> cells were then alternatively gated for their positivity to CD3 (T lymphocytes) (C) or CD11b (myeloid population) (D). Myeloid population was further divided into Ly6g<sup>+</sup>/I-Ab<sup>-</sup> cells (neutrophils) and Ly6g<sup>+</sup>/I-Ab<sup>+</sup> cells (E). Ly6g<sup>+</sup>/I-Ab<sup>+</sup> population was then split in F4/80<sup>+</sup>/Ly6c<sup>-</sup> cells (macrophages) and F4/80<sup>+</sup>/Ly6c<sup>hi</sup> cells (freshly recruited monocytes) (F).

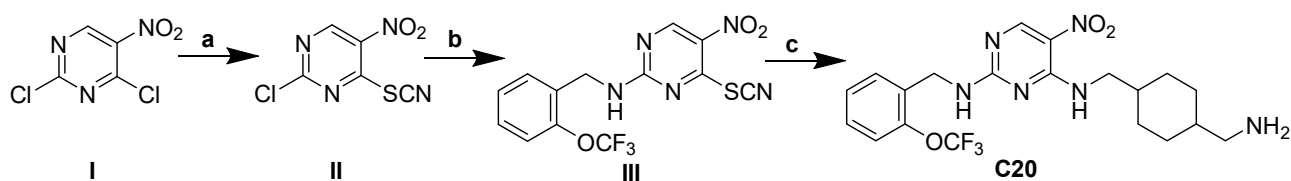

**Figure S3.** C20 synthesis. (a) KSCN, AcOH 0 °C, 2 h; (b) *o*-trifluoromethoxybenzylamine, TEA, abs EtOH, rt, 16 h; (c) 1,4-Cyclohexanebis(methylamine), DCM, rt, 16 h.
